# Supplementary material
Source: PubMed Central journal article supplement (PMC3697122)
Supplement: NIHMS417783-supplement-supplement_1.pdf [file NIHMS417783-supplement-supplement_1.pdf]

TABLE E1. Clinical information for individuals with reported disease causing *NOTCH1* mutations

| Study           | Mutation | ID    | Gender | Age | Valve morphology | Cusp fusion | Aortic stenosis | Aortic insufficiency | Calc | AscAA, surgery (age in y), other CV abnormalities    |
|-----------------|----------|-------|--------|-----|------------------|-------------|-----------------|----------------------|------|------------------------------------------------------|
| Garg et al.     | R1108X   | II-1  | F      |     | TAV              | N/A         | +               | +                    | +    | Dilated AscAo, AVR (65)                              |
|                 | "*       | II-2  | F      |     | BAV              | Unk         | +               | ?                    | +    | AVR (76)                                             |
|                 | "        | III-3 | F      |     | Dysmorphic TAV   | N/A         | ?               | ?                    | +    |                                                      |
|                 | "*       | III-5 | M      |     | BAV              | Unk         | Severe          | ?                    | +    | Dilated AscAo, AVR (26)                              |
|                 | "        | III-6 | M      |     | BAV              | Unk         | ?               | Severe               | +    | AVR (33)                                             |
|                 | "        | III-8 | F      |     | BAV              | Unk         | ?               | Mild                 | Unk  |                                                      |
|                 | "        | IV-2  | M      |     | TAV              | N/A         | Mild            | ?                    | +    |                                                      |
|                 | "        | IV-4  | M      |     | BAV              | Unk         | ?               | ?                    | Unk  | VSD, MS, parachute MV                                |
|                 | "        | V-1   | M      |     | BAV              | Unk         | Mild            | ?                    | +    | Dilated AscAo                                        |
|                 | H1505del | II-1  | F      |     | BAV              | Unk         | Severe          | ?                    | +    | AoR, AVR                                             |
|                 | "        | III-1 | M      |     | BAV              | Unk         | ?               | ?                    | Unk  | MA, HLV, DORV                                        |
| "               | III-2    | M     |        | BAV | Unk              | Severe      | ?               | +                    | AVR  |                                                      |
| Mohamed et al.  | T596M    |       | M      | 49  | BAV              | R-L, R-non  | Mild            | Mild                 | +    | Dilated AscAo [4.7 cm]                               |
|                 | P179H    |       | M      | 55  | BAV              | R-L         | Mild            | Mild                 | +    | Dilated AscAo [5.3 cm]                               |
| McKellar et al. | A1343V   |       | F      | 41  | BAV with Raphé   | R-L         | +               | ?                    | -    | AVR, graft replacement of AscAo [at 4.3 cm]          |
|                 | P1390T   |       | M      | 55  | BAV              | R-non       | +               | ?                    | +    | AVR, reduction aortoplasty [at 4.5 cm]               |
| Current study   | T1090S   | TII:4 | M      | 56  | TAV              | N/A         | -               | -                    | +    | Dilated AscAo [4.53 cm], abnormal diastolic function |

ID, Identification; Calc, calcification; AscAA, ascending aortic aneurysm; CV, cardiovascular; F, female; TAV, tricuspid aortic valve; N/A, not applicable; AscAo, ascending aorta; AVR, aortic valve repair; BAV, bicuspid aortic valve; Unk, unknown; M, male; VSD, ventral septal defect; MS, mitral stenosis; MV, mitral valve; AoR, aortic root replacement; MA, mitral atresia; HLV, hypoplastic left ventricle; DORV, double outlet right ventricle; R-L, right-left commissural fusion; R-non, right-non commissural fusion. \*Carriers assumed to have *NOTCH1* mutations but this was not confirmed by sequencing.

**000 Genotype–phenotype correlation in patients with bicuspid aortic valve and aneurysm**

*Kathleen C. Kent, PhD, Melissa L. Crenshaw, MD, Denise L. M. Goh, MD, and Harry C. Dietz, MD, Baltimore and Bethesda, Md; Petersburg, Fla; and Singapore, Republic of Singapore*

Upon sequencing individuals from 13 families with ascending aortic aneurysm and bicuspid aortic valve, we conclude that *NOTCH1* mutations are rare and specifically relate to bicuspid aortic valve with prominent valve calcification and/or dysfunction. This apparent phenotype–genotype correlation may facilitate patient counseling and management.
